# Supplementary material for: Boosting Li/Na storage performance of graphite by defect engineering
Source: Royal Society of Chemistry journal article supplement (doi:10.1039/d1ra03102c), 2021-01-01
Supplement: d1ra03102c1.pdf [file d1ra03102c1.pdf]

## Electronic Supplementary Information

### Boosting Li/Na Storage Performance of Graphite by Defect Engineering

Mingyang Ou<sup>a, ‡</sup>, Shixiong Sun<sup>a, ‡</sup>, Yi Liu<sup>a</sup>, Yue Xu<sup>a</sup>, Chang Chen<sup>c, d\*</sup>, Pei Hu<sup>a, b\*</sup>, Chun Fang<sup>a</sup>, Qing Li<sup>a</sup> and Jiantao Han<sup>a</sup>

<sup>a</sup> State Key Laboratory of Material Processing and Die & Mould Technology School of Materials Science and Engineering, Huazhong University of Science and Technology, Wuhan 430074, P. R. China

<sup>b</sup> School of Science, Hubei University of Technology, Wuhan 430068, P. R. China

<sup>c</sup> State Environmental Protection Key Laboratory of Soil Health and Green Remediation, Wuhan 430070, P. R. China

<sup>d</sup> College of Resource and Environment, Huazhong Agricultural University, Wuhan 430070, P. R. China

Corresponding Author E-mail: hupei@hbut.edu.cn (Prof. Hu), changchen@mail.hzau.edu.cn (Dr. Chen)

<sup>‡</sup>M. Ou and S. Sun contributed equally to this work.

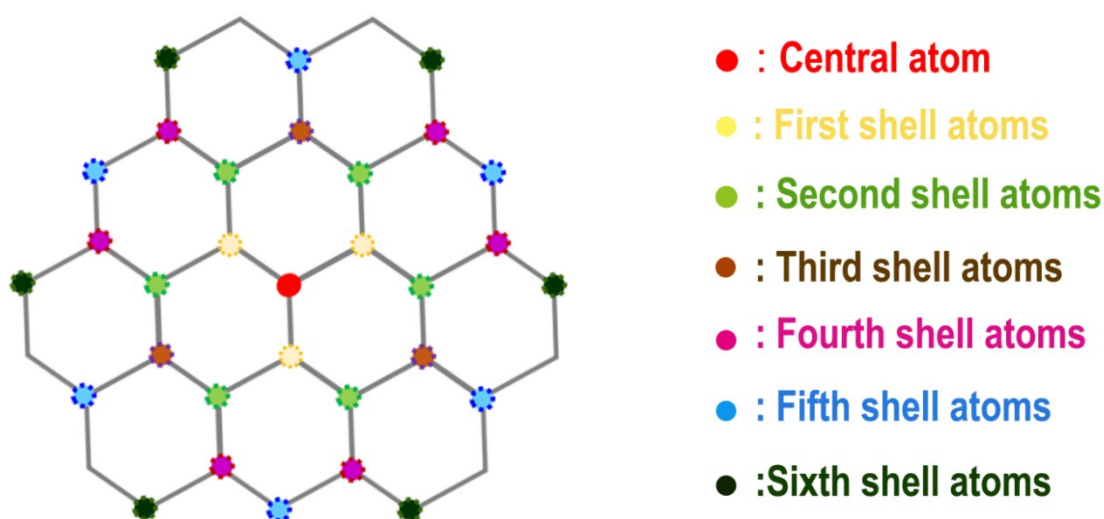

**Fig. S1.** Schematic illustration of 6-atom shells graphene unit.

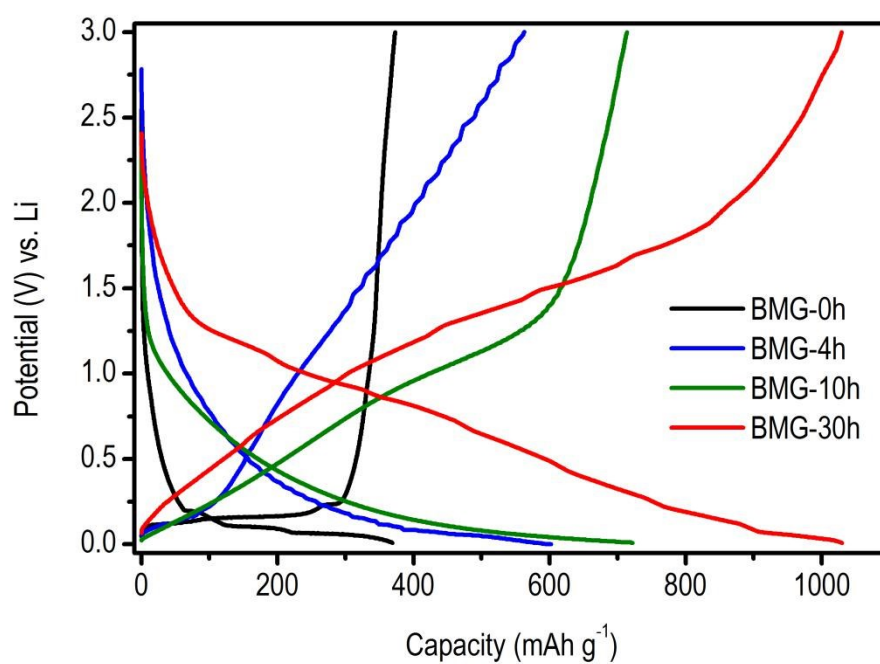

**Fig. S2.** GCD curves of BMGs at the current density of  $20 \text{ mA g}^{-1}$ .

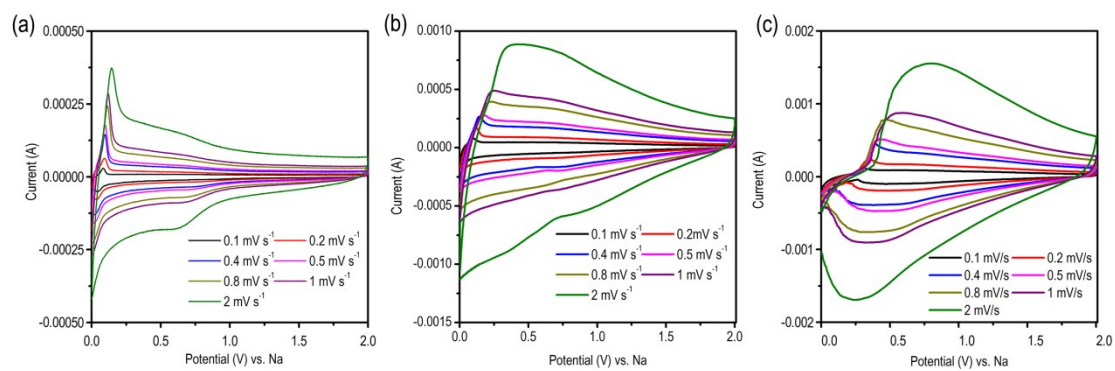

**Fig. S3.** CV curves of BMGs at different scan rate. (a) BMG-4h, (b) BMG-10h, (c) BMG-30h.
